# Supplementary material
Source: PubMed Central journal article supplement (PMC6439860)

## Supplementary Online Content

Krastev T, van Turnhout A, Vriens E, Smits L, van der Hulst R. Long-term Follow-up of Autologous Fat Transfer vs Conventional Breast Reconstruction and Association With Cancer Relapse in Patients With Breast Cancer. *JAMA Surg*. Published online October 10, 2018.

doi:10.1001/jamasurg.2018.3744

eTable. Univariable Cox-regression analysis of oncological events

eFigure 1. Incidence Rate of Locoregional Recurrence in the Subgroups With Stage 0-4 and Triple-Negative and Non-Triple-Negative Breast Cancer Cases

eFigure 2. Incidence Rate of Distant Recurrence in All Patients

eFigure 3. Incidence Rate of the Overall Mortality in All Patients

eFigure 4. Incidence Rate of Breast Cancer-Specific Mortality in All Patients

This supplementary material has been provided by the authors to give readers additional information about their work.

eTable: Univariable Cox-regression analysis of oncological events

| Variables                        | Locoregional recurrence |         | Distant recurrence |         | Overall mortality |                   | Breast cancer-related mortality |                   |
|----------------------------------|-------------------------|---------|--------------------|---------|-------------------|-------------------|---------------------------------|-------------------|
|                                  | HR                      | p-value | HR                 | p-value | HR                | p-value           | HR                              | p-value           |
| <b>Treatment group</b>           |                         |         |                    |         |                   |                   |                                 |                   |
| AFT                              | 0.63                    | 0.33    | 0.94               | 0.85    | 0.20              | <0.001*           | 0.37                            | 0.02*             |
| Control                          | 1.59                    |         | 1.06               |         | 4.96              |                   | 2.69                            |                   |
| <b>Age</b>                       | 1.01                    | 0.77    | 1.01               | 0.51    | 1.03              | 0.16              | 1.01                            | 0.64              |
| <b>Type surgery</b>              |                         |         |                    |         |                   |                   |                                 |                   |
| BCT                              | 0.94                    | 0.90    | 0.48               | 0.02*   | 0.48              | 0.03*             | 0.32                            | 0.02*             |
| MST                              | 1.06                    |         | 2.11               |         | 2.10              |                   | 3.17                            |                   |
| <b>Invasiveness</b>              |                         |         |                    |         |                   |                   |                                 |                   |
| in-situ                          | 0.78                    | 0.74    | 0.30               | 0.08    | 0.47              | 0.20              | 0.28                            | 0.18              |
| invasive                         | 1.28                    |         | 3.30               |         | 2.12              |                   | 3.64                            |                   |
| <b>B&amp;R<sup>1</sup> grade</b> |                         |         |                    |         |                   |                   |                                 |                   |
| <b>1</b>                         | 1.18                    | 0.80    | 0.15               | 0.03*   | N.A. <sup>2</sup> | N.A. <sup>2</sup> | N.A. <sup>2</sup>               | N.A. <sup>2</sup> |
| <b>2</b>                         | 0.79                    | 0.62    | 1.63               | 0.11    | 2.37              | 0.007*            | 1.87                            | 0.14              |
| <b>3</b>                         | 1.17                    | 0.75    | 0.99               | 0.97    | 0.76              | 0.40              | 0.95                            | 0.91              |
| <b>ER receptor</b>               |                         |         |                    |         |                   |                   |                                 |                   |
| Positive                         | 0.73                    | 0.53    | 1.65               | 0.20    | 1.17              | 0.67              | 0.86                            | 0.73              |
| Negative                         | 1.37                    |         | 0.61               |         | 0.86              |                   | 1.17                            |                   |
| <b>PR receptor</b>               |                         |         |                    |         |                   |                   |                                 |                   |
| Positive                         | 0.91                    | 0.85    | 0.92               | 0.79    | 1.10              | 0.78              | 0.73                            | 0.45              |
| Negative                         | 1.10                    |         | 1.09               |         | 0.91              |                   | 1.37                            |                   |
| <b>Ner-2-neu receptor</b>        |                         |         |                    |         |                   |                   |                                 |                   |
| Overexpression                   | 1.64                    | 0.30    | 1.25               | 0.48    | 1.61              | 0.13              | 1.90                            | 0.12              |
| Negative                         | 0.61                    |         | 0.80               |         | 0.62              |                   | 0.53                            |                   |
| <b>Triple-negative</b>           |                         |         |                    |         |                   |                   |                                 |                   |
| TNBC <sup>3</sup>                | 1.39                    | 0.66    | 0.52               | 0.36    | 1.19              | 0.75              | 1.65                            | 0.42              |
| Non-TNBC                         | 0.72                    |         | 1.93               |         | 0.84              |                   | 0.61                            |                   |
| <b>Chemotherapy</b>              |                         |         |                    |         |                   |                   |                                 |                   |
| Yes                              | 0.56                    | 0.23    | 2.83               | 0.003*  | 1.83              | 0.07              | 5.65                            | 0.002*            |
| No                               | 1.78                    |         | 0.35               |         | 0.55              |                   | 0.18                            |                   |
| <b>Radiotherapy</b>              |                         |         |                    |         |                   |                   |                                 |                   |
| Yes                              | 0.43                    | 0.07    | 1.97               | 0.05    | 1.63              | 0.15              | 2.42                            | 0.07              |
| No                               | 2.34                    |         | 0.51               |         | 0.61              |                   | 0.41                            |                   |
| <b>Hormonal therapy</b>          |                         |         |                    |         |                   |                   |                                 |                   |
| Yes                              | 0.92                    | 0.86    | 2.53               | 0.006*  | 2.42              | 0.01*             | 3.15                            | 0.02*             |
| No                               | 1.09                    |         | 0.40               |         | 0.41              |                   | 0.32                            |                   |
| <b>Stage</b>                     |                         |         |                    |         |                   |                   |                                 |                   |
| <b>0</b>                         | 0.78                    | 0.74    | 0.30               | 0.08    | 0.47              | 0.20              | 0.28                            | 0.18              |
| <b>I</b>                         | 2.10                    | 0.11    | 0.46               | 0.04*   | 0.44              | 0.04*             | 0.45                            | 0.13              |
| <b>II</b>                        | 0.69                    | 0.47    | 1.17               | 0.62    | 1.05              | 0.88              | 0.95                            | 0.91              |
| <b>III</b>                       | 0.57                    | 0.45    | 2.93               | <0.001* | 2.84              | <0.001*           | 3.56                            | 0.001*            |

<sup>1</sup>B&R=Bloom & Richardson classification; <sup>2</sup>No events in this subgroup; <sup>3</sup>TNBC= triple-negative breast cancer.

**eFigure 1: Incidence rate of locoregional recurrence in the subgroups with stage 0-4 and triple-negative and non-triple-negative breast cancer cases**

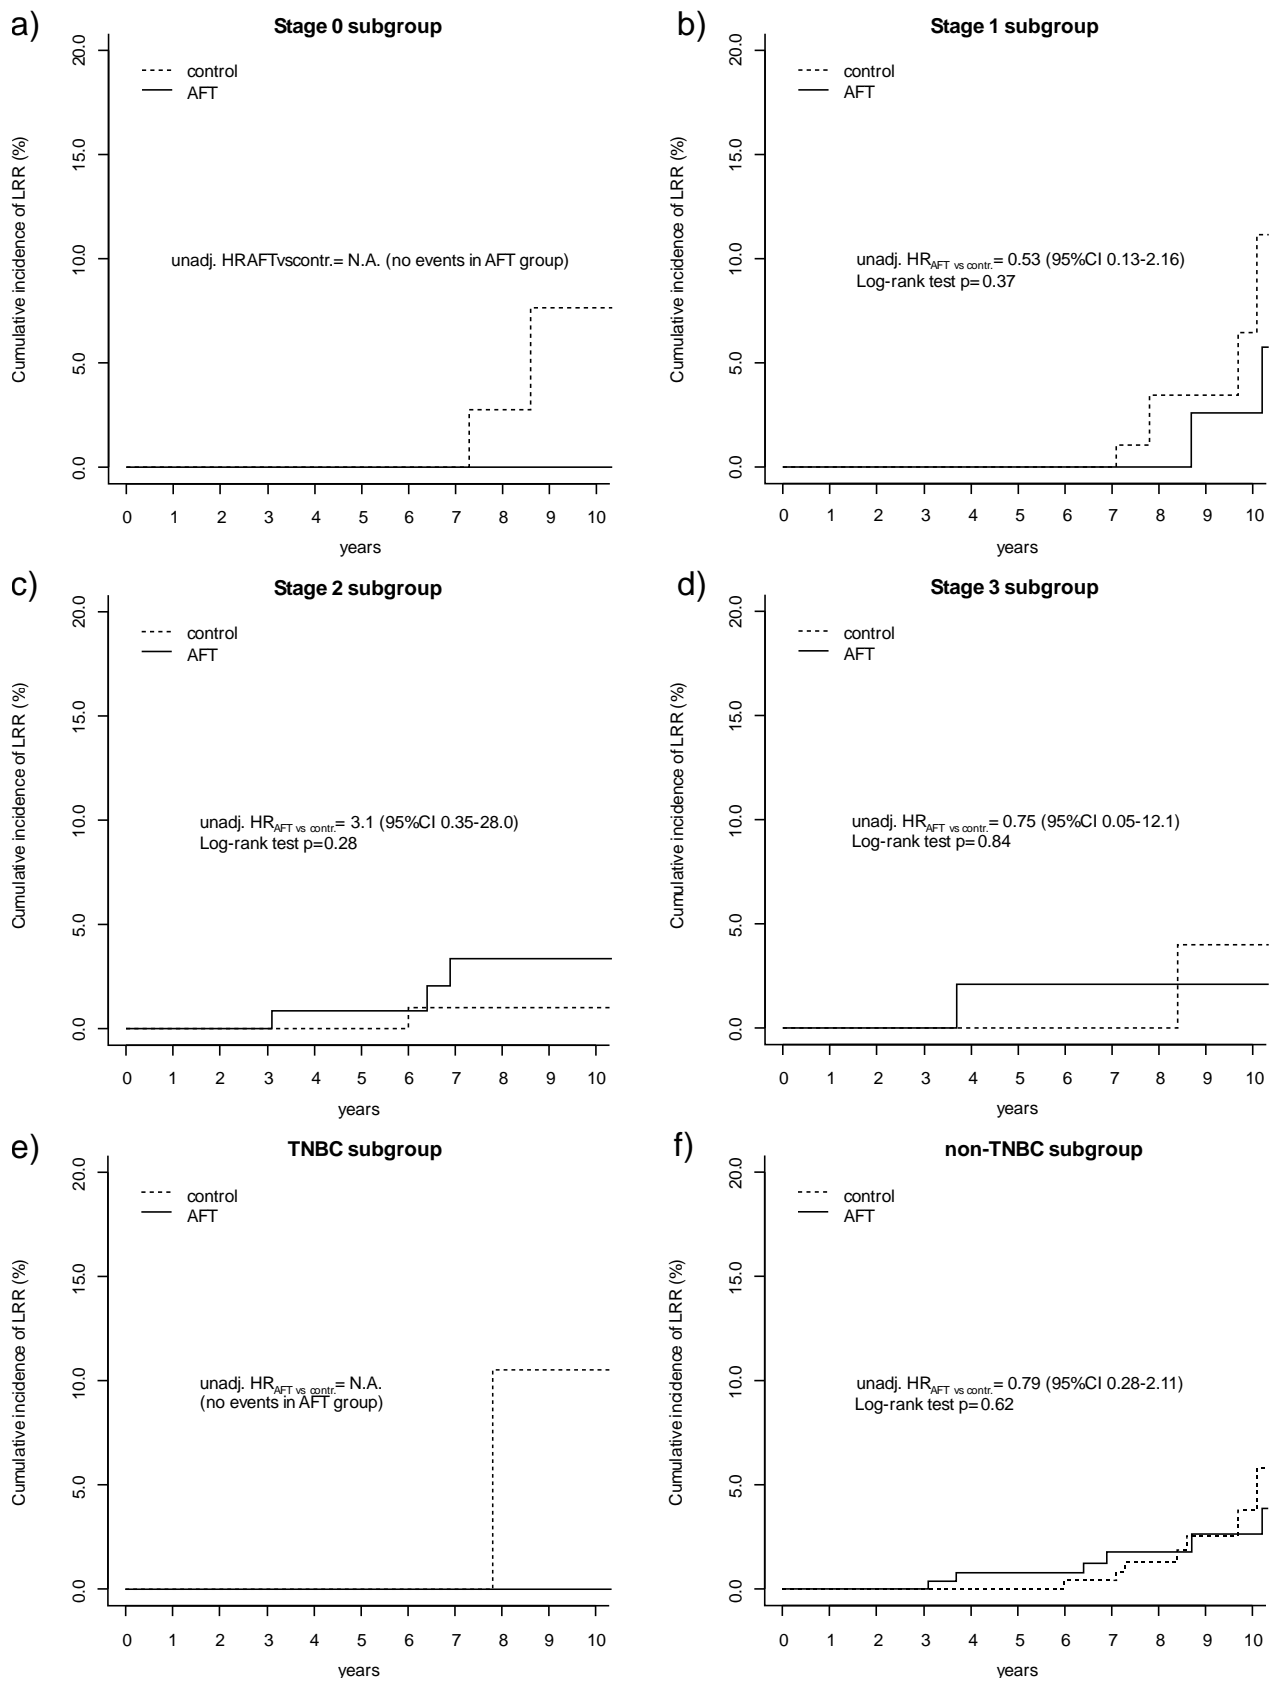

**eFigure 2: Incidence rate of distant recurrence in all patients**

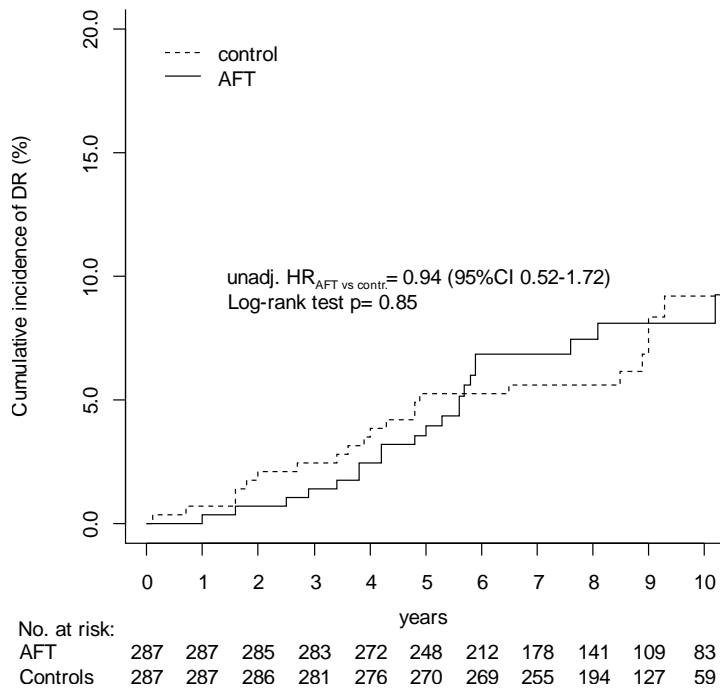

**eFigure 3: Incidence rate of the overall mortality in all patients**

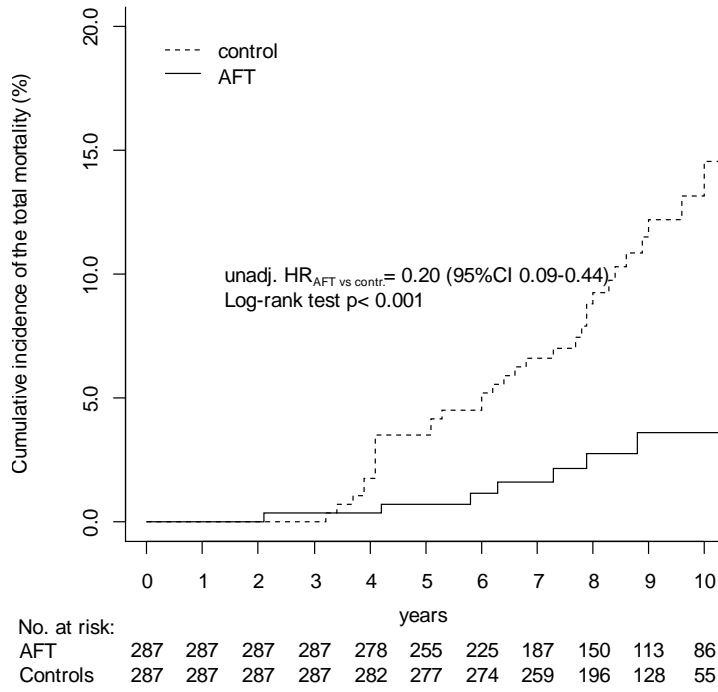

**eFigure 4: Incidence rate of breast-cancer specific mortality in all patients**

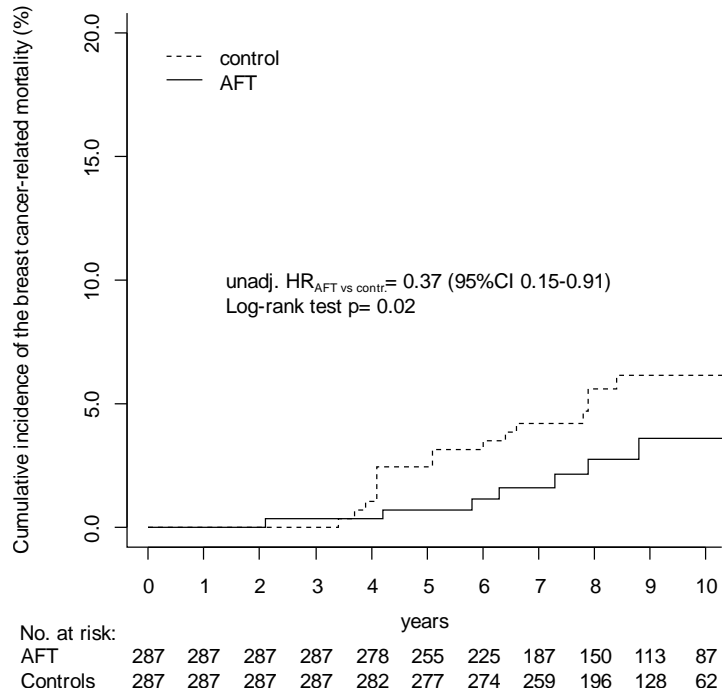

Supplement: jamasurg-154-56-s001.pdf [file jamasurg-154-56-s001.pdf]
